# Supplementary material for: Anti-cancer drug axitinib: a unique tautomerism-induced dual-emissive probe for protein analysis
Source: Royal Society of Chemistry journal article supplement (doi:10.1039/d4cc01944j), 2024-01-01
Supplement: d4cc01944j1.pdf [file d4cc01944j1.pdf]

ESI *for*

**Anti-cancer drug axitinib: A unique tautomerism-induced dual-emissive probe for protein analysis**

Na Li <sup>a</sup>, Zihao Chen <sup>a</sup>, Yilin Zhan <sup>a</sup>, Weihua Deng <sup>a</sup>, Taoyuze Lv <sup>b</sup>, Zhongyong Xu <sup>a</sup>,

Lei Wang <sup>a</sup> and Bin Liu <sup>a\*</sup>

<sup>a</sup> Guangdong Provincial Key Laboratory of New Energy Materials Service Safety,  
College of Material Science and Engineering, Shenzhen University, Shenzhen  
518060, China.

<sup>b</sup> School of Physics, The University of Sydney, NSW 2006, Australia

**Corresponding Author:**

Prof. Bin Liu, bliu@szu.edu.cn

## 20 **1. Materials and methods**

### 21 **1.1 Materials and instruments**

22 All chemicals and solvents were purchased from Energy Chemical China without  
23 further purification. Biological analytes including HSA, bovine serum albumin  
24 (BSA), lipase, lysosome, globulin, trypsin, glutathione, tyrosinase, creatinine, GSA  
25 and RNA were purchased from Sigma-Aldrich. Phosphate buffered saline (PBS, 1  
26 mM, pH ~ 7.4) was purchased J&K scientific. UV–Vis absorption and fluorescence  
27 spectra were tested by a Thermo-Fisher Evolution 220 and Thermo-Fisher Lumina  
28 fluorometer, respectively. Fluorescence lifetimes were obtained by Horiba DeltaFlex  
29 with a 359 nm Laser NanoLED.

### 30 **1.2 Basic test conditions**

31 Stock solutions (10 mM) of axitinib and acetyl-axitinib were prepared in DMSO and  
32 stored in the dark environment at room temperature. Stock solutions of HSA and BSA  
33 with concentrations of 0.5 mM were prepared in water. Adding axitinib stock solution  
34 (2  $\mu$ L) into PBS buffer (2 mL) could obtain the detection solution. Before conducting  
35 any tests, the detection solution of axitinib was exposed to a 365 nm ultraviolet lamp  
36 for 5 minutes to complete the tautomerism process. For titration experiments, HSA  
37 were added into the detection solution of axitinib and allowed to shake for at least 30  
38 seconds. For indicator displacement experiments, two site-specific drugs, warfarin  
39 (DS1) and ibuprofen (DS2) were added proportionally into the axitinib@ALB

40 complex, and the fluorescence spectra were measured after shaking for 30 seconds.  
41 Real serum sample containing 46.0 g/L HSA (certified by BCG method) was added to  
42 PBS buffer and diluted to the appropriate concentration. Upon adding the serum  
43 sample into the detection solution of axitinib, the mixture was incubated for 1 min at  
44 room temperature and then was measured.

### 45 **1.3 Molecular docking**

46 The 3D geometry of each ligand was energy minimized in Chem3D by working with  
47 mm2. The ligand-free crystal structures of HSA (PDB ID: 4K2C) and BSA (PDB ID:  
48 4F5S) were taken from the Brookhaven Protein Data Bank (<http://www.rcsb.org/pdb>)  
49 <sup>1</sup>. Flexible ligand docking was performed by AutoDock 4.2 molecular docking  
50 program using the implemented empirical free energy function and the Lamarckian  
51 Genetic Algorithm . The Autogrid was used to calculate Grids. The grid spacing was  
52 0.375 Å as default. 20 docking runs with 25,000,000 energy evaluations were  
53 performed. The output from AutoDock was rendered with PyMol. The 2D diagrams  
54 were produced by a Ligplot software.

### 55 **1.4 Fluorescence lifetime**

56 Fluorescent decay curves were recorded by a Horiba Delta-Flex instrument with a  
57 nanoLED with peak wavelength at 359 nm (Pulse duration < 1.4 ns). Lifetime was  
58 recorded at peak wavelength. IRF is the instrument response function (prompt). The  
59 radiation decay curves were typically fit to the multi-exponential model:  $I(t) = A +$

60  $I_0 \cdot \sum \alpha_i \exp (-t/\tau_i)$ . The  $I_0$  represents the original fluorescent intensity; the  $\alpha_i$  are pre-  
61 exponential factors, which represent the fractional amount of each lifetime component  
62 and the  $\sum \alpha_i$  is normalized to unity; the  $\tau_i$  refer to fluorescence lifetimes. The average  
63 fluorescence lifetime is calculated by equation:  $\tau = \sum \alpha_i \tau_i$ .

## 64 **1.5 Binding constant and stoichiometry**

65 The binding parameters can be calculated using fluorescence data. The calculation of  
66 binding constants ( $k_b$ ) and binding stoichiometry ( $n$ ) can be conducted based on the  
67 previously reported equations.<sup>[1]</sup>

$$68 \quad \log \left( \frac{F_0 - F}{F} \right) = \log k_b + n \log [Q]$$

## 69 **1.6 Limit of detection**

70 The limit of detection (LOD) was calculated by using  $3\sigma/k$  rule based on HSA  
71 titration experiments. Where  $\sigma$  is the standard deviation of blank measurement for  
72 three times and  $k$  is the slope of the fluorescence intensity plotted against the HSA  
73 concentration.

74

75

76

77

78

79

80

## 81 2. Supporting Figures

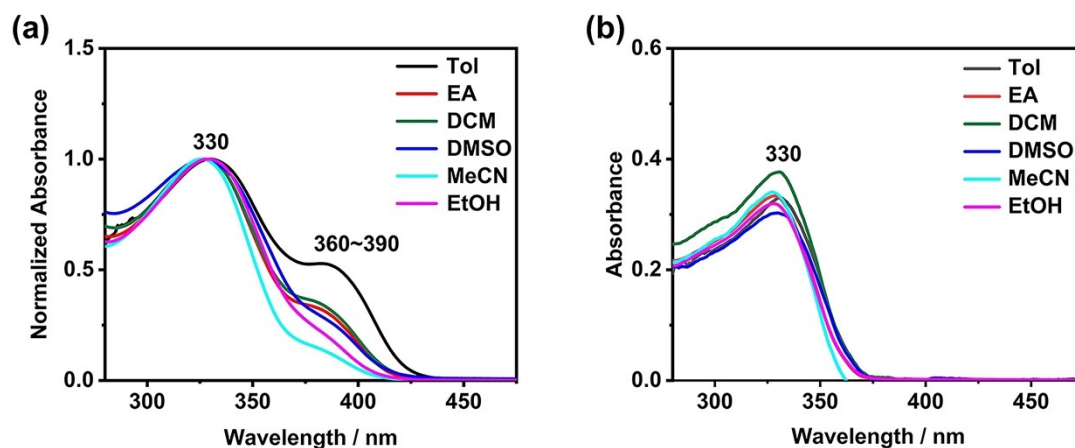

82

83 **Fig. S1** Absorbance spectra of (a) axitinib and (b) acetyl-axitinib in different solvents,

84 respectively. [axitinib] = [acetyl-axitinib] = 10  $\mu$ M.

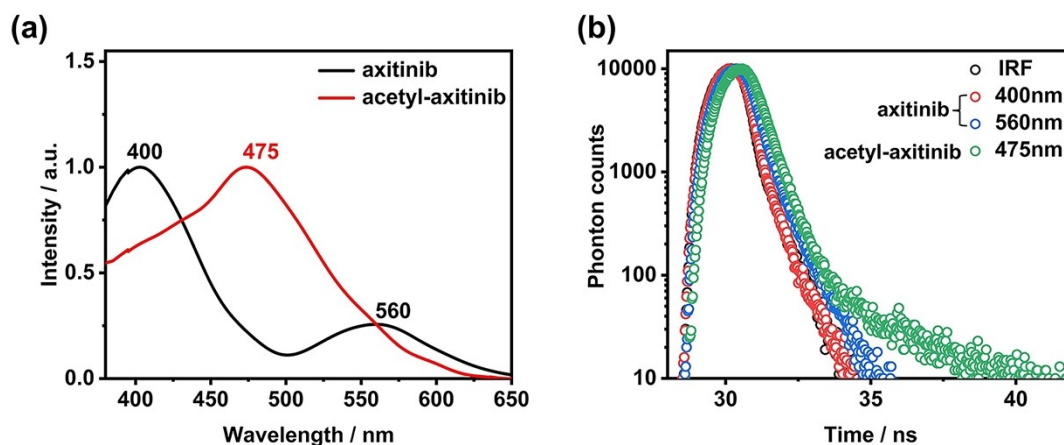

85

86 **Fig. S2** (a) Fluorescence spectra of axitinib and acetyl-axitinib in EtOH. (b)

87 Fluorescence decay curves of axitinib and acetyl-axitinib in EtOH. IRF: instrument

88 response function (prompt). Laser source is a 359 nm NanoLED. [axitinib] = [acetyl-

89 axitinib] = 10  $\mu$ M.

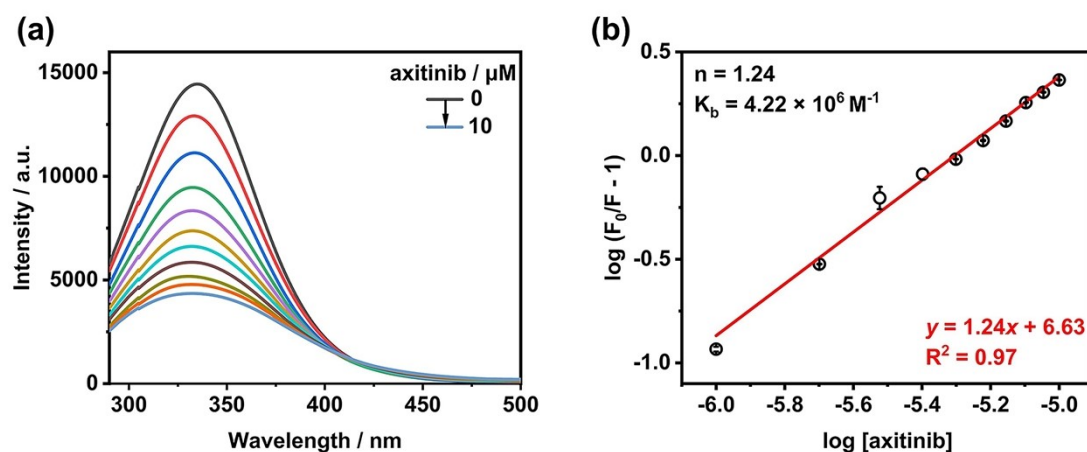

90

91 **Fig. S3** (a) Fluorescent spectra of HSA (10  $\mu$ M) in the presence of axitinib (0-10  $\mu$ M)  
 92 in PBS buffer (1 mM, pH  $\sim$  7.4). (b) The  $\log (F_0/F - 1)$  vs.  $\log [\text{axitinib}]$  for the  
 93 complex-HSA interaction corresponds,  $F_0$  and  $F$  are the fluorescence intensities of  
 94 HSA in the absence and presence of axitinib.  $\lambda_{\text{ex}} = 280$  nm.

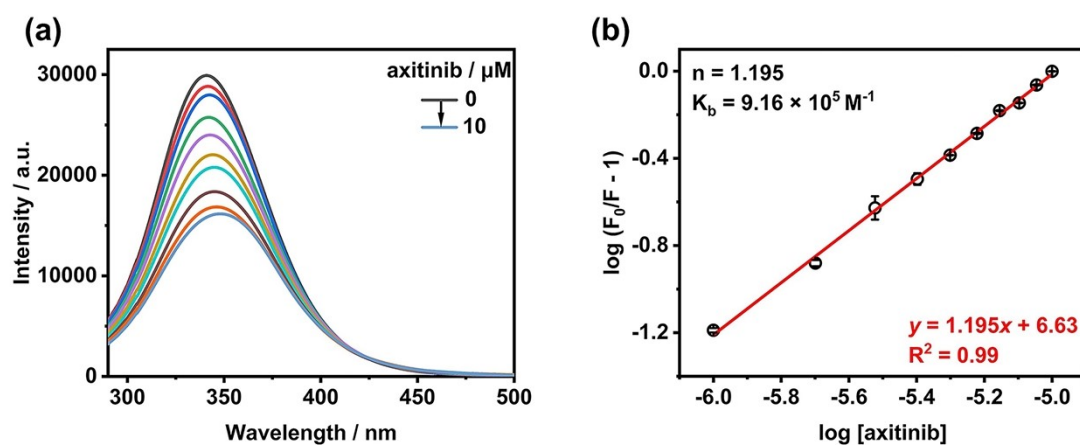

95

96 **Fig. S4** (a) Fluorescent spectra of BSA (10  $\mu$ M) in the presence of axitinib (0-10  $\mu$ M)  
 97 in PBS buffer (1 mM, pH  $\sim$  7.4). (b) The  $\log (F_0/F - 1)$  vs.  $\log [\text{axitinib}]$  for the

98 complex-BSA interaction corresponds,  $F_0$  and  $F$  are the fluorescence intensities of  
 99 BSA in the absence and presence of axitinib.  $\lambda_{\text{ex}} = 280$  nm.

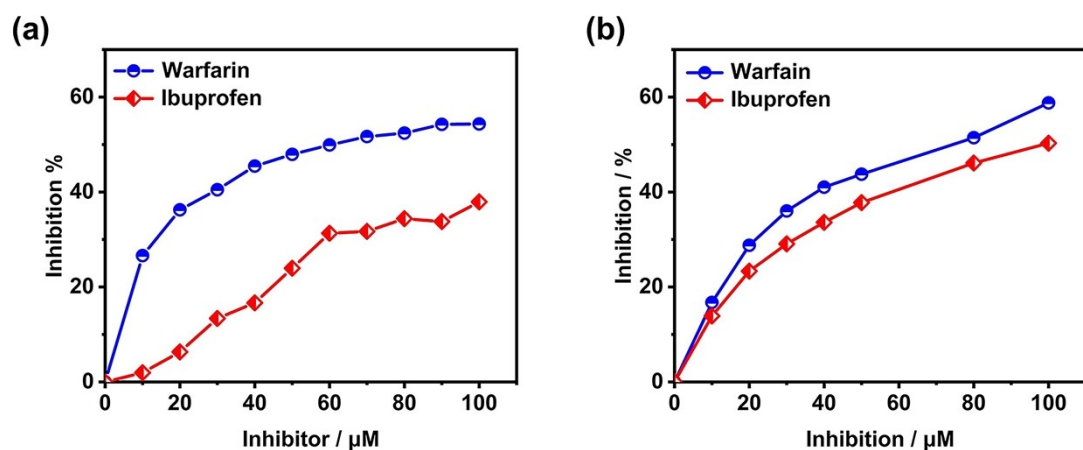

100

101 **Fig. S5** Fluorescence quenching degrees of complex (a) axitinib@HSA and (b)  
 102 axitinib@BSA with addition of site-specific indicators (warfarin for DS1 and  
 103 ibuprofen for DS2), respectively. [axitinib@HSA] = [axitinib@BSA] = 10 μM.

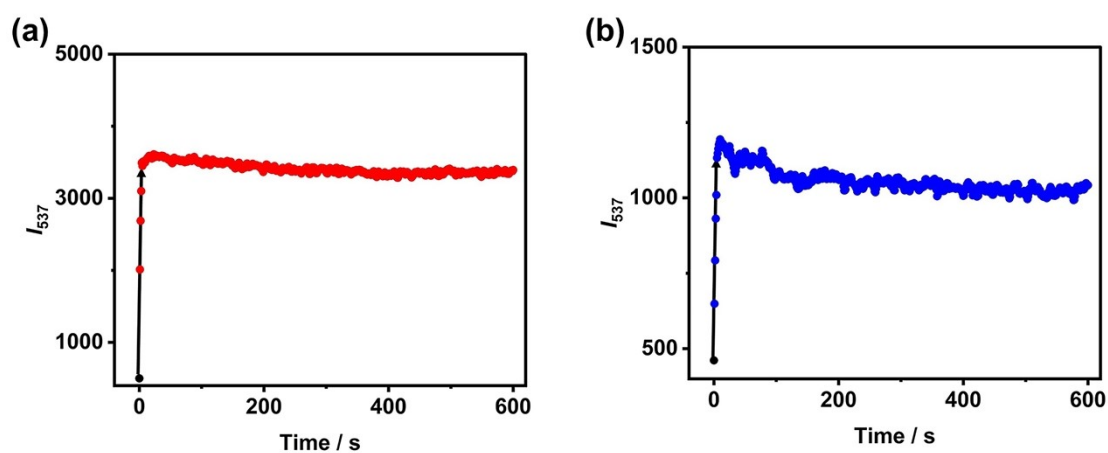

104

105 **Fig. S6** Time-dependent peak intensity of axitinib (10 μM) in the presence of 1  
 106 equivalent (a) HSA and (b) BSA in PBS buffer (1 mM, PH ~ 7.4), respectively.

107  $[AXT@HSA] = [AXT@BSA] = 10 \mu M$ .

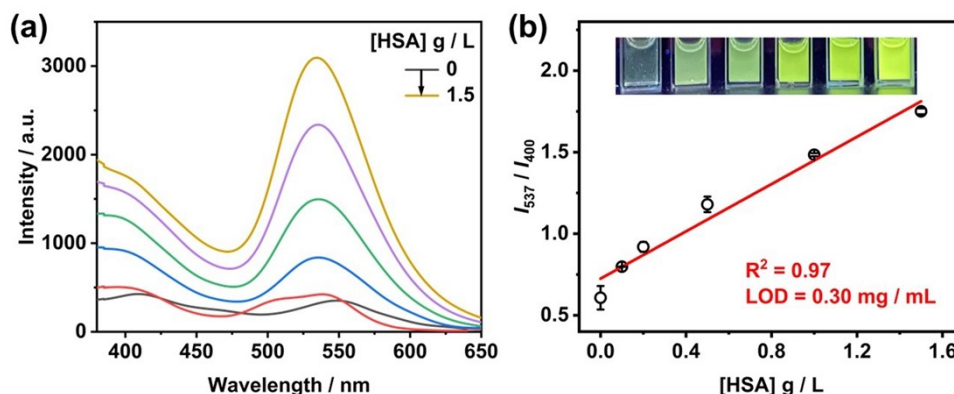

108

109 **Fig. S7** (a) Fluorescence spectra of axitinib (10  $\mu M$ ) with addition of real serum  
 110 containing the different concentration of HSA in PBS buffer (1 mM, pH  $\sim 7.4$ ). (b)  
 111 Linear relationship between intensity ratios ( $I_{537} / I_{400}$ ) of axitinib (10  $\mu M$ ) and  
 112 concentration of HSA. Error bars =  $\pm SD$  for three measurements.  $\lambda_{ex} = 360 \text{ nm}$ .

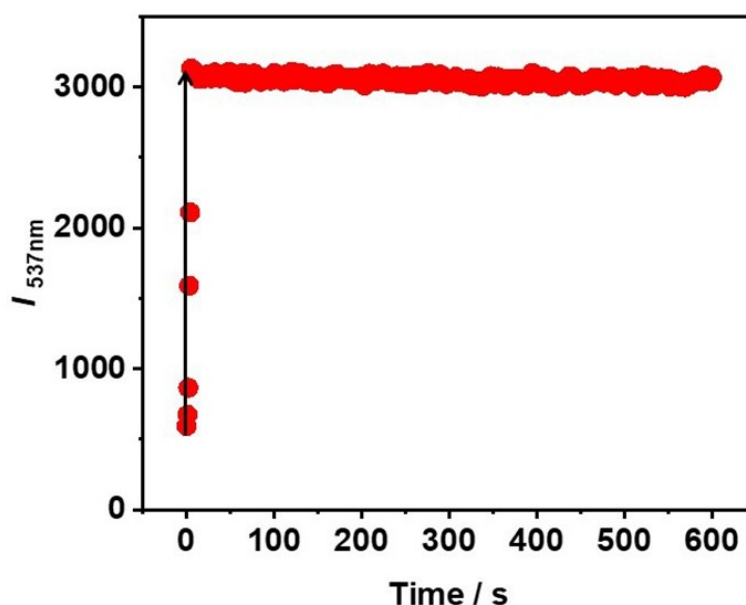

113

114 **Fig. S8** Time-dependent peak intensity of axitinib (10  $\mu M$ ) with addition of real  
 115 serum containing the HSA (1.5 g/L) in the PBS buffer (1mM, pH  $\sim 7.4$ ).  $\lambda_{ex} = 360$   
 116 nm.

117

118

119                   **Table S1** Detection of HSA in serum by using axitinib

| Added (g / L) | Detected (g / L) | Recovery (%) | RSD (%) |
|---------------|------------------|--------------|---------|
| 0.10          | 0.11             | 108.27       | 1.40    |
| 0.50          | 0.52             | 103.70       | 8.49    |
| 1.00          | 1.06             | 106.15       | 1.30    |

120

121 **Reference:**

122 1. Y. Wang, H. Yu, X. Shi, Z. Luo, D. Lin and M. Huang, *Journal of Biological*  
123 *Chemistry*, 2013, **288**, 15980-15987.

124
